# Supplementary material
Source: publisher site journal article supplement (https://www.spandidos-publications.com/1810/downloadSupplementary)
Supplement: Supplementary file 1 [file downloadSupplementary]

## Sheet: Sheet1
Table SVI. Results of univariate Cox regression model with P-values <0.05. HR, hazard ratio.
Gene	HR	z	P-value
CD5L	0.936852	-0.789657	0.429728
AC127496.1	0.779522	-2.21612	0.0266832
AC091230.1	0.810335	-1.54155	0.123183
LMAN1L	0.715707	-1.6202	0.10519
FAM9C	0.926749	-0.64488	0.519005
SPIC	0.875253	-1.16462	0.244171
KCNT1	0.87349	-1.35356	0.175877
AC023154.1	1.0706	0.737042	0.461097
STAB2	0.908476	-1.48926	0.13642
CD160	0.74037	-2.23779	0.0252349
NKX2-5	0.946314	-0.671594	0.501842
SLC9A5	0.747646	-1.89317	0.0583353
GPR182	0.893866	-1.35002	0.177011
CXCR2P1	1.01364	0.244863	0.806563
AC008609.1	0.999659	-0.00294428	0.997651
MMP12	1.17964	3.09156	0.00199108
NPIPA9	0.862086	-1.31273	0.189275
ITGAD	0.901691	-1.42487	0.154196
EEF1A1P24	1.23638	2.01843	0.0435462
IDI2-AS1	1.00992	0.0933032	0.925663
AC073850.1	0.739066	-2.50311	0.0123107
KLRF1	1.10383	1.02904	0.303459
SCN11A	0.703471	-3.76216	0.000168452
ADRA1A	0.898194	-1.36924	0.170926
RF00100	1.11153	1.33485	0.181925
LINC00996	0.892881	-1.60983	0.107435
UMODL1-AS1	0.802425	-1.96795	0.0490735
DNASE1L3	0.835593	-2.99616	0.00273404
GDF7	0.861786	-2.00607	0.0448493
NR5A1	0.845536	-1.46631	0.142565
TBC1D27P	0.95174	-1.00927	0.312847
DNAH17-AS1	1.16235	1.90192	0.057181
OR5G5P	1.07657	0.725759	0.467986
H3F3C	1.23711	1.58333	0.113345
FCRL3	0.974086	-0.538163	0.590464
PARP15	0.962978	-0.534808	0.592783
U62631.1	1.00272	0.0386254	0.969189
KLRD1	1.11822	1.32435	0.185385
SIGLEC11	0.988962	-0.160353	0.872603
CCM2L	0.660631	-3.44641	0.000568078
NCR1	1.03895	0.439178	0.660532
AC245884.6	0.868111	-0.830751	0.406114
ABCA9-AS1	0.919333	-0.87702	0.380476
FGFBP2	0.828594	-2.13637	0.0326493
AIF1L	0.964301	-0.442573	0.658075
LRTM1	0.729085	-2.17346	0.0297458
LINC01894	1.11775	1.20659	0.227588
KLHL14	0.932102	-1.24593	0.212791
CD22	0.923584	-1.38742	0.165315
LEFTY2	0.956879	-0.604813	0.545303
CRHBP	0.775978	-3.57758	0.000346789
CR1	1.02373	0.439718	0.660141
AP001605.1	0.870533	-1.1209	0.262331
TBX21	1.00014	0.00182253	0.998546
SNORD17	1.13315	1.44975	0.147128
RN7SL752P	1.00934	0.075044	0.94018
ATP4B	0.996369	-0.0316779	0.974729
TRAPPC3L	1.0993	0.947777	0.343243
KIR3DX1	0.933005	-0.60525	0.545013
AC009951.1	0.928151	-0.633481	0.52642
CR786580.1	0.852828	-1.55849	0.119117
AC007952.6	0.977933	-0.220549	0.825444
AL031658.1	0.790862	-2.45444	0.0141104
TRG-AS1	1.02527	0.303206	0.761733
FCRL2	0.943686	-1.21602	0.223976
AL137789.1	1.03345	0.240993	0.80956
CLECL1	0.962486	-0.558313	0.57663
AC010970.1	1.08718	2.11388	0.0345253
LILRA1	0.957939	-0.584791	0.558688
TLR10	0.940914	-1.0404	0.298155
AC007728.2	1.05621	0.540598	0.588785
CD36	0.887001	-1.99631	0.0459005
TM4SF19	1.00985	0.127768	0.898332
GLYCTK-AS1	0.793317	-2.35861	0.0183437
AC012123.1	0.810797	-1.92686	0.0539966
CHRNA4	0.749069	-2.71192	0.00668948
FCRL6	1.00158	0.020228	0.983862
AC112229.3	1.13383	1.24735	0.212269
PTGDR	0.975155	-0.30438	0.760838
FCRL5	1.01796	0.419073	0.675163
AC079015.1	0.73336	-3.24159	0.00118864
KMO	0.97332	-0.301714	0.76287
IL9RP3	0.935141	-0.803053	0.421944
P2RX5	0.972511	-0.560356	0.575237
BFSP2	0.929611	-0.923987	0.355493
AL356234.1	1.08589	0.989821	0.322261
ZBTB20-AS1	0.969107	-0.303087	0.761823
C11orf21	0.983392	-0.228435	0.819308
CASP16P	0.952518	-0.552542	0.580577
CFP	0.826965	-2.25194	0.0243261
FGD2	1.0379	0.400288	0.688944
KLRC4-KLRK1	0.864453	-1.71506	0.0863334
PATL2	0.951224	-0.569629	0.56893
FGR	1.02488	0.287962	0.773376
AC104809.1	0.828801	-1.38014	0.167544
LINC01537	0.964019	-0.404276	0.68601
LY86-AS1	0.953472	-0.594941	0.551883
TNFRSF13B	0.971409	-0.629177	0.529233
TLX1NB	1.05984	0.527289	0.597993
LINC00528	0.828494	-2.00266	0.0452142
LINC01684	1.07065	0.865091	0.386989
AC010976.2	0.782501	-3.10286	0.0019166
HIST2H3C	1.04925	0.504023	0.614245
ADAD2	0.860871	-1.90682	0.0565442
TEX101	0.981592	-0.243255	0.807808
ITGB2-AS1	1.02621	0.371299	0.710415
FP671120.5	1.13562	1.64698	0.0995631
CD300LB	0.948866	-0.669219	0.503356
TDGF1	0.946933	-0.86409	0.387538
P2RX5-TAX1BP3	0.617693	-3.6953	0.000219629
PARVG	0.979974	-0.232207	0.816377
BTG1P1	0.809042	-2.18448	0.0289272
AC060234.2	0.924767	-0.964264	0.334914
SCIMP	0.947049	-0.704808	0.48093
HBA2	0.9431	-1.17369	0.240517
KRT72	0.902215	-1.40319	0.16056
TRDV1	1.00761	0.0877079	0.930109
BANK1	1.10084	1.27684	0.201659
DEFA4	0.908621	-0.768493	0.442194
TXK	0.965336	-0.346091	0.729274
PZP	0.859504	-1.61927	0.105389
AC004687.1	0.845453	-2.43291	0.014978
NCF1C	0.977698	-0.294715	0.768212
MS4A1	0.956411	-1.28073	0.20029
NKG7	1.02016	0.227488	0.820044
LILRB1	0.986029	-0.170889	0.864311
CHI3L1	1.14449	2.32734	0.0199471
MATK	0.812384	-2.03243	0.0421098
FCRL1	0.96921	-0.772586	0.439767
Z84723.1	0.948652	-0.584223	0.55907
CNR2	0.963274	-0.820164	0.412123
NFIA-AS2	0.884837	-1.6416	0.100674
PAX5	0.951208	-1.2519	0.210607
ABHD17AP5	1.02374	0.215016	0.829755
AL023653.1	0.954909	-0.473516	0.635845
KLRK1	0.872952	-1.70342	0.0884902
ADGRE1	0.925316	-1.04711	0.295051
RPL7AP10	0.948022	-0.567679	0.570253
ZC3H12D	0.940459	-0.70072	0.483478
AC108206.1	1.0068	0.0963143	0.923271
AC018697.1	0.845443	-1.40865	0.158938
TSPAN32	0.896065	-1.31787	0.187547
POU2F2	0.943595	-0.618242	0.536416
TRGC1	1.01447	0.203332	0.838876
OR5G3	1.06505	0.515524	0.606187
HK3	1.07401	1.00431	0.315229
RNU4-62P	0.94758	-0.602894	0.546579
LINC00173	0.917945	-1.11502	0.264842
CETP	0.795004	-2.16851	0.0301198
WDFY4	0.985461	-0.235392	0.813905
SLC5A10	0.90236	-1.07732	0.281335
KIR2DL1	0.877408	-1.16614	0.243558
CD72	1.06371	0.720682	0.471105
KCNJ10	0.777224	-2.69375	0.00706523
TLX1	1.13054	2.21134	0.0270121
FAM53B-AS1	0.736095	-2.44721	0.0143968
LINC01857	1.00516	0.098218	0.921759
IL18RAP	0.946049	-0.645169	0.518818
DCSTAMP	1.11028	1.61918	0.105408
LILRB5	0.930195	-1.07397	0.282838
NPY5R	0.9149	-1.43886	0.15019
KLRC4	0.960781	-0.454405	0.649538
AL137786.1	0.905053	-1.07302	0.283263
TMC8	0.998909	-0.0128284	0.989765
CD19	0.991225	-0.202333	0.839656
KRT17P8	1.02311	0.209977	0.833686
ITGAL	0.995534	-0.0649369	0.948224
AC005332.2	0.823086	-2.16902	0.030081
CD52	1.03218	0.447745	0.654337
CD244	1.00968	0.115816	0.907799
Z97192.3	0.921406	-0.884942	0.376188
AC012645.3	0.961749	-0.50923	0.610591
LILRA4	0.978674	-0.423725	0.671766
HBB	0.956242	-0.889598	0.373682
AL365475.1	0.971809	-0.287385	0.773817
KRT73	0.922317	-0.768861	0.441976
EOMES	0.971112	-0.483885	0.628468
AC004381.1	1.03592	0.381579	0.702774
KEL	0.915672	-1.15953	0.24624
AC008033.3	0.806486	-2.13971	0.0323786
AC018755.4	0.98986	-0.171263	0.864017
TRDC	0.989154	-0.12804	0.898117
HBA1	0.961467	-0.596211	0.551034
AL359885.1	0.890774	-0.866645	0.386136
PLEK	1.03604	0.48335	0.628847
CD180	1.05051	0.719719	0.471698
SASH3	0.981827	-0.236649	0.812929
CCL2	0.965486	-0.536111	0.591882
AC015660.4	0.854118	-1.19063	0.233797
ACAP1	0.755426	-2.56528	0.0103091
BTK	1.02361	0.313336	0.754025
MCOLN2	0.993227	-0.0926075	0.926215
PSG9	1.03901	0.368218	0.712711
AC010175.1	0.74912	-2.84819	0.00439691
KLF1	1.08014	0.626287	0.531127
PPP1R16B	0.82317	-2.05638	0.0397455
UNC45B	0.942856	-0.664518	0.506359
COL4A3	0.994225	-0.0870397	0.93064
C1QTNF1-AS1	0.90039	-1.3388	0.180635
CDHR1	0.825347	-2.70527	0.00682491
AC008750.1	0.954755	-0.497795	0.618628
IL4I1	1.08239	0.986267	0.324002
AL451067.1	0.803601	-1.455	0.14567
IKZF3	1.03058	0.460244	0.645341
BTLA	0.956828	-0.764731	0.444432
FCAMR	1.00515	0.0977605	0.922122
AC023510.2	0.860765	-1.9727	0.0485296
TNFRSF13C	0.952215	-0.903315	0.366359
P2RY13	0.933181	-1.06905	0.285045
MAP4K1	0.938039	-0.791802	0.428476
LINC01781	0.995257	-0.0956639	0.923787
AC008040.1	0.78336	-2.44642	0.0144282
PRKCB	0.95852	-0.690865	0.489651
GDPD2	1.06974	1.09516	0.273447
AP003086.1	0.721821	-3.57346	0.00035229
BLK	0.945596	-1.28794	0.197766
SPATC1	0.936413	-0.822356	0.410874
HCG22	0.980538	-0.250811	0.80196
KRT75	0.991868	-0.139569	0.889001
AC243960.1	0.863765	-1.82682	0.0677272
TPO	0.922916	-1.54533	0.122268
AMTN	1.01478	0.32804	0.742882
BTBD6P1	0.894663	-1.37916	0.167846
TBC1D10C	0.887568	-1.46904	0.141822
LINC02245	0.887248	-1.13652	0.25574
C10orf90	1.04734	0.555917	0.578268
CADM3-AS1	0.898222	-2.09868	0.0358449
AC007386.1	0.938487	-0.499305	0.617565
MIR3609	0.804848	-1.48178	0.138399
FAM129C	0.901805	-2.05755	0.0396332
SP140	1.08329	1.13654	0.255731
SIGLEC22P	1.03819	0.3955	0.692474
AC104809.2	0.889798	-1.76611	0.0773772
FABP4	0.953353	-1.11635	0.264271
GPR18	0.966622	-0.533194	0.5939
GVINP1	1.00882	0.132903	0.89427
HEATR9	0.865497	-1.60184	0.10919
TRGC2	0.999705	-0.0044894	0.996418
GAPT	0.999199	-0.0134546	0.989265
AC104024.1	0.966022	-0.36098	0.718114
NCF1	0.987077	-0.176421	0.859963
GPR55	0.916892	-1.19067	0.233785
AC099792.1	0.710173	-3.12228	0.00179456
FCRLA	0.970865	-0.723623	0.469298
RASGRP2	0.857412	-1.9481	0.0514034
GIMAP5	0.848775	-1.88517	0.0594062
STAP1	1.00646	0.108315	0.913746
AC063977.6	0.871505	-1.28707	0.198068
NPY1R	0.884608	-1.95032	0.0511379
CDCA4P1	1.00358	0.0344482	0.97252
SEMA3D	1.01046	0.187468	0.851294
MIR6774	1.03853	0.315366	0.752484
CD37	0.973673	-0.368518	0.712487
RIPOR2	0.981775	-0.267649	0.78897
TEX53	0.813118	-1.4592	0.14451
AC079793.1	0.994412	-0.0537464	0.957137
NOX5	0.965166	-0.531596	0.595006
TREML2	1.12439	2.11415	0.0345024
SCN4A	0.832067	-2.73917	0.0061595
FAM30A	0.966953	-0.761992	0.446065
AC123912.4	1.01046	0.204502	0.837961
CX3CR1	0.905698	-1.49217	0.135655
ACTG1P21	1.10475	0.683869	0.494058
FAM238A	0.847036	-1.60879	0.107663
CARMIL2	0.756568	-3.50658	0.000453904
SLC4A1	0.837465	-1.98213	0.0474648
AC093010.1	0.822571	-1.51629	0.129445
AC064805.1	0.955055	-0.532643	0.594281
LINC00926	0.933134	-1.05599	0.290974
SIGLEC5	0.991625	-0.122421	0.902566
MTHFD2P1	0.919378	-0.953896	0.340136
SNORA73B	1.1942	2.30277	0.0212919
RN7SL5P	0.868655	-1.27912	0.200854
LINC00943	1.08738	0.99358	0.320427
CCR6	0.94343	-0.85427	0.392956
GLYATL1B	0.862575	-1.27687	0.201647
LINC01645	1.02273	0.24896	0.803392
TRAF3IP3	0.978796	-0.285062	0.775597
TTC24	0.984506	-0.233426	0.81543
LINC01215	0.985659	-0.293325	0.769274
E2F3P1	0.868315	-1.53199	0.125525
ZAP70	0.907741	-1.26839	0.204658
AL133371.2	0.896564	-1.52865	0.126351
RPL31P11	0.922433	-0.76213	0.445982
AC003957.1	0.858184	-1.51615	0.129482
AL121985.1	0.920505	-0.949873	0.342177
HLA-DOB	1.07803	1.14229	0.253335
KRT79	1.18148	2.48581	0.0129256
AL161756.2	0.846596	-1.1938	0.232555
RSL24D1P11	0.739744	-2.24114	0.0250169
AC023301.1	1.0667	1.12919	0.25882
AC093010.2	0.856583	-1.63789	0.101445
LINC01010	1.03803	0.522038	0.601644
SLC12A3	0.946371	-0.699521	0.484227
AL031595.1	0.974834	-0.297009	0.76646
AC119396.1	0.872325	-1.83231	0.0669052
AC060764.1	1.11296	0.832776	0.404971
AC016027.2	0.867727	-1.19822	0.230831
CELF2-AS1	0.941788	-0.850602	0.39499
SCARNA10	1.00518	0.066499	0.946981
IRX6	0.911571	-1.29436	0.195542
LINC02422	0.959976	-0.691692	0.489131
AL096816.1	0.868483	-2.21388	0.0268373
LINC01539	1.02477	0.257044	0.797145
LINC00494	0.942883	-1.1818	0.237286
AL355076.3	0.929823	-0.716291	0.473811
PSG5	1.04437	0.531734	0.594911
PIK3CD-AS1	0.973067	-0.281783	0.77811
HLA-DQB1-AS1	1.03379	0.507743	0.611634
AL034397.3	0.879632	-1.95607	0.0504564
AJAP1	0.904229	-1.53336	0.125186
PF4V1	1.12654	1.46647	0.142519
AC103809.1	0.839688	-1.58826	0.112227
AL353801.1	0.824545	-1.6455	0.0998676
DIRC3-AS1	0.858317	-1.23513	0.216783
AP000924.1	1.07089	1.02672	0.304553
PTCRA	0.994067	-0.0809893	0.93545
AL683807.1	1.0056	0.073453	0.941446
CHI3L2	1.00746	0.125839	0.899859
KIR3DL1	0.979481	-0.222929	0.823591
LTB	1.02742	0.47124	0.637469
GGTLC1	1.03029	0.4339	0.664361
AL356417.1	0.911474	-0.937183	0.348664
LINC01447	0.888772	-0.96302	0.335537
NCR3	0.959233	-0.596011	0.551168
LINC02137	1.00116	0.0109489	0.991264
SCNN1G	0.98958	-0.26464	0.791287
AC015909.3	0.793927	-2.13994	0.0323599
AC092145.1	1.02973	0.351882	0.724927
LINC02413	0.96711	-0.402776	0.687113
PGM5P3-AS1	0.852269	-1.77903	0.0752346
OR52N4	1.03618	0.472334	0.636688
FCMR	0.917153	-1.24786	0.212083
KIR2DL3	1.09474	0.951705	0.341247
DDX11L10	0.818489	-1.44066	0.14968
HMGN2P19	1.05842	0.379379	0.704406
TRGV4	0.964772	-0.466962	0.640527
AC079584.2	0.818016	-1.7276	0.0840598
LINC02576	0.896439	-1.52619	0.126962
RETN	1.05957	1.28008	0.200519
AC010247.1	1.01783	0.205301	0.837337
CCL14	0.916481	-1.44349	0.148884
TNXA	0.883703	-1.57805	0.114553
CXCR5	0.970212	-0.581392	0.560976
AL645608.2	0.934264	-0.938098	0.348194
REELD1	0.828408	-2.20052	0.0277698
AC119428.2	0.98085	-0.2421	0.808702
EIF3FP1	0.9299	-0.619119	0.535838
AC073072.1	0.985654	-0.189267	0.849883
AC098935.2	0.907479	-1.19185	0.233318
AC015911.6	0.997078	-0.0236233	0.981153
ALAS2	0.995781	-0.0574865	0.954158
LINC01800	0.978201	-0.243309	0.807766
ITPKB-IT1	0.94303	-0.58517	0.558434
AC103858.1	0.858331	-1.48058	0.138719
CXCL6	1.14019	2.77496	0.00552086
C12orf42	0.833385	-2.69657	0.00700567
CD27	0.989296	-0.164739	0.86915
PRAMENP	0.960169	-0.682301	0.495049
AC009970.1	0.771935	-1.78616	0.0740734
CAMP	1.04123	0.617777	0.536722
CLEC17A	0.932011	-1.35845	0.174322
SIRPG-AS1	0.916702	-1.00809	0.313409
IGHJ3P	0.986016	-0.245309	0.806217
FCER2	0.961758	-0.962786	0.335655
AL121772.1	1.17351	1.99797	0.0457199
GTSF1L	0.849949	-1.54592	0.122123
CPN2	0.97691	-0.37629	0.706702
CCDC26	1.05482	0.443771	0.657208
SIGLEC14	1.01889	0.409126	0.682447
CD79B	0.935469	-1.10259	0.270205
AC083949.1	0.997759	-0.030935	0.975321
TBATA	1.14951	1.19876	0.230621
TRGV3	0.936927	-0.812965	0.416238
AC008649.1	1.02379	0.18923	0.849913
AC016168.1	0.880495	-1.02653	0.304642
AL365356.4	1.03267	0.460032	0.645493
B3GNT3	1.43933	3.59179	0.000328417
AC007381.1	0.944943	-0.561398	0.574527
AL512378.1	0.991151	-0.0710705	0.943342
SCARNA5	1.11833	1.42587	0.153906
PCDH11X	0.858164	-1.54066	0.123401
DEFA3	1.07907	0.805868	0.420319
AIM2	1.1456	2.3882	0.0169313
ANKRD20A19P	0.954189	-0.500662	0.616609
AC009065.5	1.22794	2.77634	0.00549753
SLC7A10	0.867208	-2.40796	0.0160421
AL031733.2	0.904303	-1.33511	0.181842
SNORA54	0.915151	-0.737706	0.460693
AL121985.3	0.923529	-0.816606	0.414154
ABCA12	1.19189	3.15285	0.00161688
AC243960.7	0.801932	-1.77433	0.0760086
FCRL4	1.00742	0.125595	0.900052
AC104699.1	0.958572	-0.577735	0.563443
AL161781.2	0.954296	-0.653977	0.513127
MIR4538	0.922569	-0.996686	0.318917
AC020907.1	1.11301	1.92216	0.0545861
AC008878.3	0.948312	-0.76013	0.447177
TM4SF19-TCTEX1D2	0.767847	-2.02866	0.0424934
TRAV1-1	0.925567	-0.827863	0.407748
FXYD3	1.18816	2.34717	0.0189166
TSPAN1	1.34593	3.50537	0.000455978
LINC02397	0.955069	-0.86285	0.38822
SERPINA9	0.94073	-1.02233	0.306627
IL13	0.796778	-2.26378	0.0235879
AC093904.2	1.19854	2.78315	0.00538337
SIRPB3P	0.783322	-1.90593	0.0566588
PPP1R14D	1.2033	3.00004	0.00269948
STYK1	1.36391	3.51146	0.00044566
HLA-DQA2	1.02524	0.47114	0.637541
SH3TC2	1.29865	3.20027	0.00137301
SPATA21	0.914281	-1.09341	0.274213
CD79A	1.00423	0.0986718	0.921399
ZNF560	0.884097	-1.13049	0.258268
ZIC2	1.07062	1.74855	0.080368
IL24	0.962063	-0.567452	0.570407
BEND4	0.878139	-2.26483	0.0235234
LINC02132	1.01097	0.141751	0.887277
CR2	0.980446	-0.686868	0.492166
AC105105.1	0.894467	-0.97539	0.329367
MIR4537	0.927168	-0.87195	0.383236
LINC00628	1.21772	2.57826	0.00992983
AP002957.1	1.26402	2.56182	0.0104125
TNMD	0.896593	-1.76509	0.0775479
SNORD15B	1.1445	1.49373	0.135245
C2orf70	0.842299	-2.33929	0.0193205
HIST1H2BD	1.38047	3.4768	0.000507431
CHRNA5	1.06751	0.746451	0.455395
JPH1	1.04783	0.51953	0.603391
SLC7A11	1.18278	2.45546	0.0140702
AP001994.1	0.925781	-0.660811	0.508734
AC104971.3	1.00034	0.0043359	0.99654
LINC02244	1.13634	1.60811	0.107812
AL162457.1	0.876535	-1.16593	0.243642
DNAH8	0.939991	-0.914737	0.36033
AC006946.3	0.945199	-0.490978	0.623442
RNU4-2	1.01179	0.184201	0.853855
CKMT1A	0.989596	-0.130006	0.896561
AL031429.1	0.852263	-1.39991	0.161541
HIST2H2BE	1.06935	0.704223	0.481294
AFAP1-AS1	1.10972	2.49136	0.0127254
ZNF80	0.903451	-1.42037	0.155501
SPDEF	1.15551	3.07319	0.00211781
LINC00365	1.12756	1.73442	0.0828429
KCNK1	1.40082	3.36079	0.000777203
AC009065.2	1.20838	2.59779	0.00938261
